# Supplementary material for: Protective interlayer for trapping polysulfides and a conducting host for sulfur: dual role of candle soot carbon for the development of high performance lithium–sulfur batteries
Source: Royal Society of Chemistry journal article supplement (doi:10.1039/d1ma00115a), 2021-01-01

**Protective interlayer for trapping polysulfides and conducting host for sulfur: Dual role of candle soot carbon for the development of high performance Lithium-Sulfur battery**

Vikram K. Bharti, Ananya Gangadharan, S. Krishna Kumar, Anil D. Pathak, Chandra S. Sharma\*

Creative & Advanced Research Based On Nanomaterials (CARBON) Laboratory,  
Department of Chemical Engineering, Indian Institute of Technology Hyderabad,  
Kandi-502285, Telangana

\*Corresponding author: Email: [cssharma@che.iith.ac.in](mailto:cssharma@che.iith.ac.in)

**Supporting information**

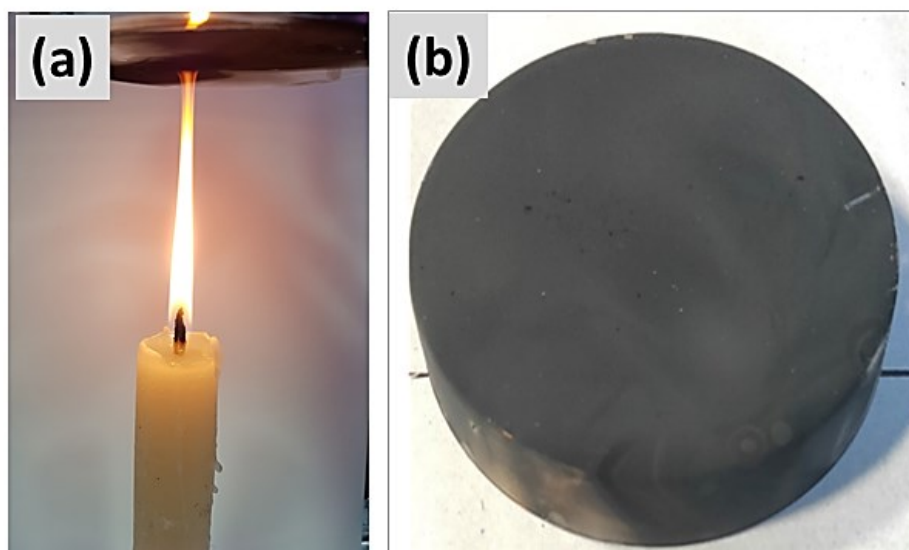

**Fig. S1** (a) Collecting candle soot from the tip of the flame (b) collected candle soot.

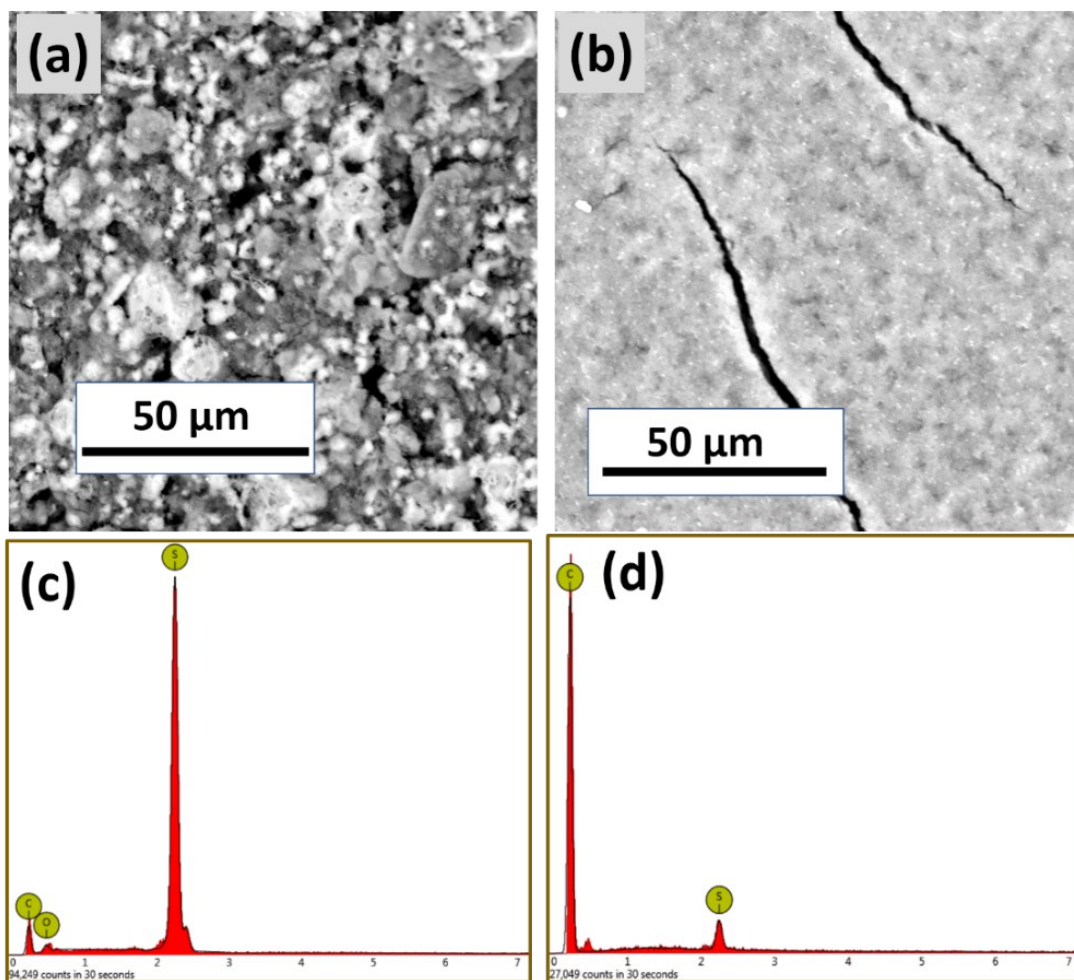

**Fig. S2** SEM image of (a) SC (b) C-SC; EDAX analysis of (c) SC (d) C-SC.

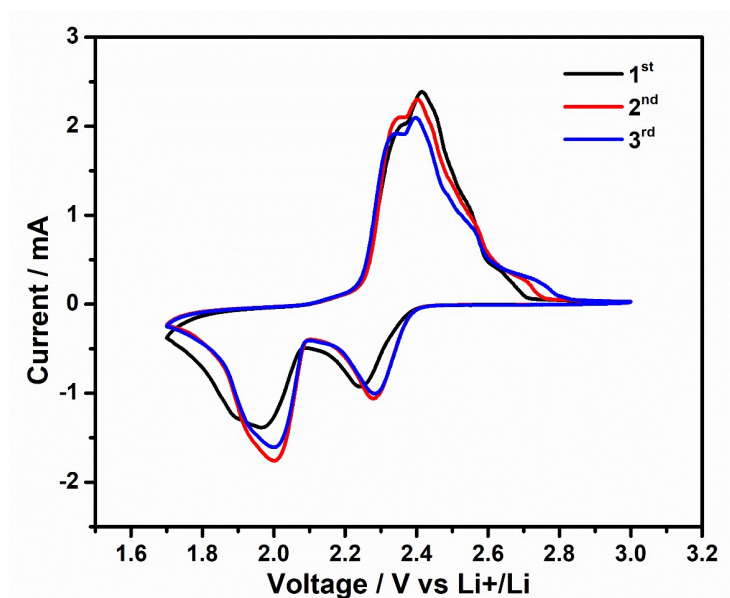

**Fig. S3** CV of C-SC at the scan rate of 0.1 mV.s<sup>-1</sup>.

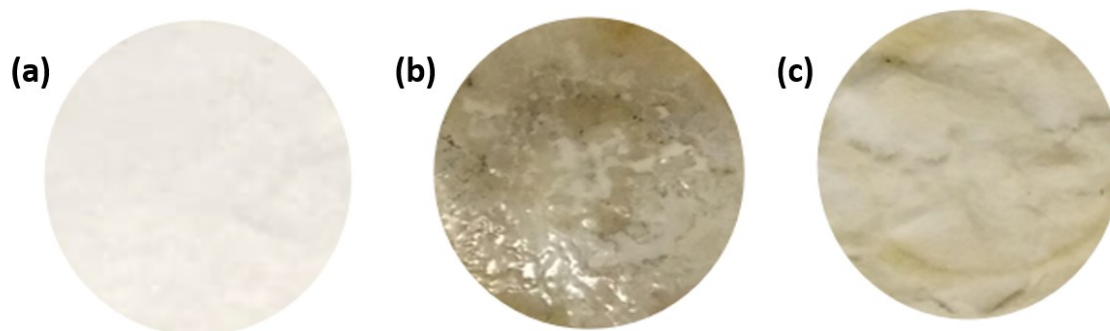

**Fig. S4** Digital image of glass fiber separator (a) before cycling (b) after cycling [100 cycles] using SC as cathode; (c) after cycling [200 cycles] using C-SC as cathode.

**Equation S1:** Set of possible interaction between higher order polysulfides and carbon interlayer:

A. Possible interactions of  $\text{Li}_2\text{S}_4$

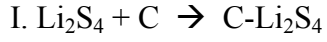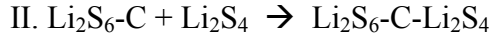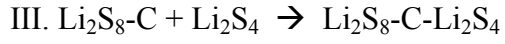

B. Possible interactions of  $\text{Li}_2\text{S}_6$

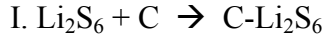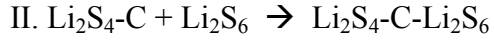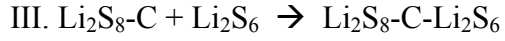

C. Possible interactions of  $\text{Li}_2\text{S}_8$

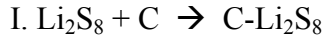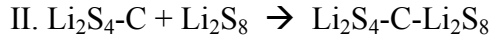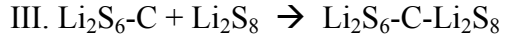

Supplement: d1ma00115a1.pdf [file d1ma00115a1.pdf]
